# Supplementary material for: Nanoarchitectonics of Electrically Activable Phosphonium Self-Assembled Monolayers to Efficiently Kill and Tackle Bacterial Infections on Demand
Source: MDPI journal article supplement (doi:10.3390/ijms23042183), 2022-02-16
Supplement: s1 [file s1]

## Supporting Information

### Development of electrically activable phosphonium self-assembled monolayers to efficiently kill and tackle bacterial infections on-demand.

Serena Carrara,<sup>1#†</sup> Florent Rouvier,<sup>2†</sup> Sanjana Auditto,<sup>1</sup> Frédéric Brunel,<sup>1</sup> Charlotte Jeanneau,<sup>3</sup> Michel Camplo,<sup>1</sup> Michelle Sergent,<sup>4</sup> Imad About,<sup>3</sup> Jean-Michel Bolla<sup>2\*</sup> and Jean-Manuel Raimundo<sup>1\*</sup>

<sup>1</sup> Aix-Marseille Univ, CNRS, CINAM, Marseille, France.

<sup>2</sup> Aix-Marseille Univ, INSERM, SSA, IRBA, MCT, Marseille, France.

<sup>3</sup> Aix-Marseille Univ, CNRS, ISM, Inst Movement Sci, Marseille, France.

<sup>4</sup> Aix-Marseille Université, Avignon Université, CNRS, IRD, IMBE, Marseille, France.

### Table of Contents

|                                 |   |
|---------------------------------|---|
| 1.1 Synthesis .....             | 2 |
| 1.2 Design of Experiments ..... | 3 |

## 1.1 Synthesis

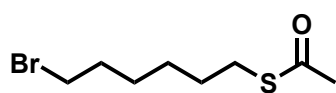

**S-(6-Bromohexyl) ethanethioate. (1).** Dibromohexane (6 g; 24.6 mmol; 5 eq.) into acetone (125 mL) was added potassium thioacetate (561 mg; 5 mmol; 1 eq.). Then the mixture was stirred at room temperature for 16 hours. The solvent was then evaporated under high vacuum and the obtained residue was taken up into water (75 mL), the aqueous phase was extracted with DCM (3 x 50 mL). The combined organic layers were washed with brine (50 mL), dried over  $\text{MgSO}_4$ , filtered and evaporated under vacuum. The product was purified over  $\text{SiO}_2$  column flash chromatography (EP / AcOEt ; 95 : 5) to give a colorless oil (779 mg ; 3.26 mmol ; 65% yield).  $^1\text{H}$  NMR (400 MHz ;  $\text{CDCl}_3$ ):  $\delta$  3.39 (t, 2H,  $J$  6.6 Hz), 2.85 (t, 2H,  $J$  7.4 Hz), 2.31 (s, 3H), 1.84 (quint, 2H,  $J$  7.2 Hz), 1.57 (quint, 2H,  $J$  7.2 Hz), 1.41 (m, 4H).  $^{13}\text{C}$  (101 MHz,  $\text{CDCl}_3$ ):  $\delta$  196.6, 33.1, 32.6, 30.7, 29.4, 29, 27.9, 27.4. ESI MS : 239.1 m/z :  $[\text{M}+\text{H}]^+$  ; 245.0 m/z :  $[\text{M}+\text{Li}]^+$ .

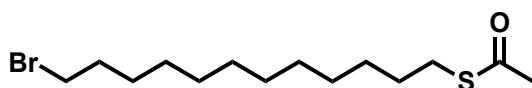

**S-(6-Bromododecyl) ethanethioate (2).** To a solution of 1,12-dibromododecane (5 g; 15.2 mmol; 5 eq.) into acetone (125 mL) was added potassium thioacetate (348 mg; 3 mmol; 1 eq.) under inert atmosphere. Then the mixture was let to react at room temperature for 16 hours. The solvent was then evaporated under high vacuum and the obtained residue was taken up into water (150 mL) and the aqueous phase was extracted with DCM (3 x 100 mL). The combined organic layers were washed with brine (100 mL), dried over  $\text{MgSO}_4$ , filtered and evaporated under vacuum. The product was purified over  $\text{SiO}_2$  column flash chromatography (EP : AcOEt ; 95 : 5) to give a colorless oil (721 mg ; 2.23 mmol; 74% yield).  $^1\text{H}$  NMR (400 MHz ;  $\text{CDCl}_3$ ):  $\delta$  3.39 (t, 2H,  $J$  6.8 Hz), 2.85 (t, 2H,  $J$  7.4 Hz), 2.31 (s, 3H), 1.84 (quint, 2H,  $J$  7 Hz), 1.53 (quint, 2H,  $J$  7.2 Hz), 1.40 (quint, 2H,  $J$  7.2 Hz), 1.25 (br, 14H).  $^{13}\text{C}$  NMR (101 MHz ;  $\text{CDCl}_3$ ):  $\delta$  196.2, 34.2, 32.9, 30.7, 29.6, 29.2, 28.9, 28.2 ; 6 signals obscured or overlapping. ESI MS : 325 m/z :  $[\text{M}+\text{H}]^+$  ; 342.1 m/z :  $[\text{M}+\text{NH}_4]^+$  ; 346.9 m/z :  $[\text{M}+\text{Na}]^+$ .

## 1.2 Design of Experiments

|                 | Number of levels | Name /Value         |
|-----------------|------------------|---------------------|
| <b>Factor 1</b> | <b>3</b>         | <b>Contact time</b> |
| Level 0         |                  | 30 min              |
| Level 1         |                  | 60 min              |
| Level 2         |                  | 120 min             |
| <b>Factor 2</b> |                  | <b>Voltage</b>      |
| Level 0         | <b>4</b>         | CA 0.2              |
| Level 1         |                  | CA 0.5              |
| Level 2         |                  | CA 0.8              |
| Level 3         |                  | CVM                 |
| <b>Factor 3</b> | <b>7</b>         | <b>Ionic Liquid</b> |
| Level 0         |                  | Without             |
| Level 1         |                  | 6-12 50%            |
| Level 2         |                  | 6-12 100%           |
| Level 3         |                  | 8-6 50%             |
| Level 4         |                  | 8-6 100%            |
| Level 5         |                  | 8-12 50%            |
| Level 6         |                  | 8-12 100%           |

*Figure S1.* Factors and levels for DOE matrix preparation.

| Experiment | Ionic Liquid | Contact time | Voltage |
|------------|--------------|--------------|---------|
| 1          | Without      | 30           | CA 0.2V |
| 12         | Without      | 120          | CVM     |
| 20         | 6-12 50%     | 60           | CA 0.8V |
| 22         | 6-12 50%     | 30           | CVM     |
| 29         | 6-12 100%    | 60           | CA 0.5V |
| 36         | 6-12 100%    | 120          | CVM     |
| 42         | 8-6 50%      | 120          | CA 0.5V |
| 43         | 8-6 50%      | 30           | CA 0.8V |
| 50         | 8-6 100%     | 60           | CA 0.2V |
| 52         | 8-6 100%     | 30           | CA 0.5V |
| 57         | 8-6 100%     | 120          | CA 0.8V |
| 66         | 8-12 50%     | 120          | CA 0.5V |
| 71         | 8-12 50%     | 60           | CVM     |
| 75         | 8-12 100%    | 120          | CA 0.2V |
| 79         | 8-12 100%    | 30           | CA 0.8V |
| 83         | 8-12 100%    | 60           | CVM     |

*Figure S2.* Critical factors extrapolated from the complex matrix for DOE.
